# Supplementary material for: VIRdb: a comprehensive database for interactive analysis of genes/proteins involved in the pathogenesis of vitiligo
Source: PeerJ. 2020 May 21;8:e9119. doi: 10.7717/peerj.9119 (PMC7246032; doi:10.7717/peerj.9119)
Supplement: Supplemental Information 1 — All protein Targets [file peerj-08-9119-s001.xlsx]

## Sheet: Target_Proteins
S. No.	Protein	Description	SwissProt ID	String ID	Gene Name ID	KEGG ID	Method	Resolution	PDB ID	Target Active Site AA	Chain	Active Site Reference
1	SUMO2	Small ubiquitin-related modifier 2	P61956	9606.ENSP00000405965	SUMO2	hsa:6613	X- Ray DIffraction	3.2 Å	2IO3	Asp71, Asn68, Asp63, Arg61, Phe87, Arg59, Gln90, Asp85	B	10.1038/nsmb1168
2	COPS5	COP9 signalosome complex subunit 5	Q92905	9606.ENSP00000350512	COPS5	hsa:10987	X- Ray DIffraction	2.46 Å	5JOG	Asp151, Met78, His138, Glu76	A	10.1038/ncomms13166
3	MYC	Myc proto-oncogene protein	P01106	9606.ENSP00000479618	MYC	hsa:4609	X- Ray DIffraction	2.701 Å	5I50	His12, Glu16, Arg20	A/B	10.1038/onc.2016.354
4	ELAVL1	ELAV-like protein 1	Q15717	9606.ENSP00000385269	ELAVL1	hsa:1994	X- Ray DIffraction	2.9 Å	4EGL	Ser158	A	10.1128/MCB.01530-07
5	SMAD3	Mothers against decapentaplegic homolog 3	P84022	9606.ENSP00000332973	SMAD3	hsa:4088	X- Ray DIffraction	2.12 Å	5ODG	His126, Cys64, Cys109	A/B	10.1038/s41467-017-02054-6
6	YWHAQ	14-3-3 protein theta	P27348	9606.ENSP00000371267	YWHAQ	hsa:10971	X- Ray DIffraction	1.986 Å	6BCR	Ser325, Thr340, Thr360, Ser366	A	10.1038/s41467-019-08317-8
7	CUL1	Cullin-1	Q13616	9606.ENSP00000326804	CUL1	hsa:8454	X- Ray DIffraction	2 Å	3TDZ	Ala106, Phe117, Ala98, Leu184	A	10.1126/science.1209307
8	HSPA8	Heat shock cognate 71 kDa protein	P11142	9606.ENSP00000432083	HSPA8	hsa:3312	X- Ray DIffraction	2.2 Å	3FZF	Thr14, Tyr15, Glu268, Lys271, Ser275	A	10.1021/jm801627a
9	ESR2	Estrogen receptor beta	Q92731	9606.ENSP00000343925	ESR2	hsa:2100	X- Ray DIffraction	2.95 Å	1L2J	Glu305, Leu339, Phe356, Gly472	A	10.1038/nsb787
10	LRRK2	Leucine-rich repeat serine/threonine protein kinase 2	Q5S007	9606.ENSP00000298910	LRRK2	hsa:120892	X- Ray DIffraction	2.00 Å	2ZEJ	Ala1490, Asp1455, Thr1349, Thr1348, Gly1344, Lys1347, Gly1346, His1453	A	10.1073/pnas.0709098105
11	XRCC5	X-ray repair cross-complementing protein 5	P13010	9606.ENSP00000375978	XRCC5	hsa:7520	X- Ray DIffraction	2.50 Å	1JEY	Arg403	A/B	10.1038/35088000
12	SMAD2	Mothers against decapentaplegic homolog 2	Q15796	9606.ENSP00000262160	SMAD2	hsa:4087	X- Ray DIffraction	2.20 Å	1DEV	Thr372, Cys374, Lys375, Pro377, Ile376, Leu382,Tyr366	A/C	10.1126/science.287.5450.92
13	XRCC6	X-ray repair cross-complementing protein 6	P12956	9606.ENSP00000352257	XRCC6	hsa:2547	X- Ray DIffraction	2.50 Å	1JEY	Arg400	A	10.1038/35088000
14	BRCA1	Breast cancer type 1 susceptibility protein	P38398	9606.ENSP00000418960	BRCA1	hsa:672	X- Ray DIffraction	1.85 Å	1T15	Ser1655	A	10.1038/nsmb775
15	RGS1	Regulator of G-protein signaling 1	Q08116	9606.ENSP00000356429	RGS1	hsa:5996	X- Ray DIffraction	2.55 A	2GTP	Thr327, Lys270, Arg176, Thr48	A	10.1073/pnas.0801508105
16	MTOR	Serine/threonine protein kinase	P42345	9606.ENSP00000354558	MTOR	hsa:2475	X- Ray DIffraction	2.7 Å	1FAP	Glu54, Ile56, Tyr82, Gln53, Trp59, Asp37	A	10.1126/science.273.5272.239
17	PRKDC	DNA-dependent protein kinase catalytic subunit	P78527	9606.ENSP00000313420	PRKDC	hsa:5591	X- Ray DIffraction	4.3 Å	5LUQ	Thr3950, Thr946, Ser1003, Ser2029, Ser2023	A	10.1126/science.aak9654
18	BAG3	BAG family molecular chaperone regulator 3	O95817	9606.ENSP00000358081	BAG3	hsa:9531	X-Ray Unavailable	Unavailable	Unavailable	Unavailable	Unavailable	Unavailable
19	IRF1	Interferon regulatory factor 1	P10914	9606.ENSP00000245414	IRF1	hsa:3659	Unavailable	Unavailable	Unavailable	Unavailable	Unavailable	Unavailable
20	CD69	Early activation antigen	Q07108	9606.ENSP00000228434	CD69	hsa:969	X- Ray DIffraction	1.371 Å	3HUP	Ala136, Arg134, Tyr135, Arg134	A/B	10.1107/S1744309109043152
21	GAPDH	Glyceraldehyde-3-phosphate dehydrogenase	P04406	9606.ENSP00000229239	GAPDH	hsa:2597	X-Ray Unavailable	1.75 Å	1U8F	Arg80, Thr99, Pro36, Asp35, Arg13, Ile14	P	10.1107/S0907444905042289
22	IFIT3	Interferon-induced protein with tetratricopeptide repeats 3	O14879	9606.ENSP00000360883	IFIT3	hsa:3437	X-Ray Unavailable	2.54 Å	6C6K	Lys155	B,E	10.1016/j.immuni.2018.01.014
23	CD68	Macrosialin	P34810	9606.ENSP00000250092	CD68	hsa:968	X-Ray Unavailable	Unavailable	Unavailable	Unavailable	Unavailable	Unavailable
24	PPARG	Peroxisome proliferator-activated receptor gamma	P37231	9606.ENSP00000287820	PPARG	hsa:5468	X- Ray DIffraction	2.1 Å	1FM6	His449, Met364, Met348, Gly284, Met348, Leu330, Tyr473, His323, Ser289	D, X	10.1016/S1097-2765(00)80448-7
25	TRAF1	TNF receptor-associated factor 1	Q13077	9606.ENSP00000362994	TRAF1	hsa:7185	X- Ray DIffraction	2.8 Å	3M0D	Arg48, Met33, Leu30, Tyr31, Ser34, Phe39, Ser37	D	10.1016/j.molcel.2010.03.009
26	GZMA	Granzyme A	P12544	9606.ENSP00000274306	GZMA	hsa:3001	X- Ray DIffraction	2.4 Å	1ORF	Phe215, Gly216, Ser195, Gly193, Cys191, Asp189, Ser214	A	10.1038/nsb944
27	EDN2	Endothelin-2	P20800	9606.ENSP00000361668	EDN2	hsa:1907	Unavailable	Unavailable	Unavailable	Unavailable	Unavailable	Unavailable
28	INS	Insulin	P01308	9606.ENSP00000380432	INS	hsa:3630	X- Ray DIffraction	2.4 Å	1JK8	Cys79, Cys15	B	10.1038/88694
29	CFTR	Cystic fibrosis transmembrane conductance regulator	P13569	9606.ENSP00000003084	CFTR	hsa:1080	X- Ray DIffraction	2.3 Å	1XMJ	Ser466, Trp401, Thr460, Thr465, Lys464, Gly461	A	10.1074/jbc.M410968200
30	HSPB1	Heat shock protein beta-1	P04792	9606.ENSP00000248553	HSPB1	hsa:3315	X- Ray DIffraction	2 Å	3Q9P	Cys137, Asp115, Asp149	A	10.1016/j.jmb.2011.05.024
31	GBP1	Guanylate-binding protein 1	P32455	9606.ENSP00000359504	GBP1	hsa:2633	X- Ray DIffraction	1.7 Å	1F5N	Asp184, Arg183, Lys51, Leu247, Tyr53, Gly50, Ser52, Thr75, His74, Leu250, Thr49	A	10.1093/emboj/19.17.4555
32	PCNA	Proliferating cell nuclear antigen	P12004	9606.ENSP00000368458	PCNA	hsa:5111	X- Ray DIffraction	1.88 Å	1U7B	Phe344	A	10.1016/j.str.2004.09.018
33	NCF2	Neutrophil cytosol factor 2	P19878	9606.ENSP00000356505	NCF2	hsa:4688	X- Ray DIffraction	2.4 Å	1E 96	His69	B	10.1016/S1097-2765(05)00091-2
34	PML	Promyelocytic leukemia protein	P29590	9606.ENSP00000268058	PML	hsa:5371	X- Ray DIffraction	1.5 Å	4WJN	Ser50, Tyr51, Leu47	B	10.1016/j.str.2014.10.015
35	SMAD4	Mothers against decapentaplegic homolog 4	Q13485	9606.ENSP00000341551	SMAD4	hsa:4089	X- Ray DIffraction	2.7 Å	1U7V	Arg496, Arg497, Arg493	B	10.1016/j.molcel.2004.07.016
36	LPAR1	Lysophosphatidic acid receptor 1	Q92633	9606.ENSP00000363553	LPAR1	hsa:1902	X- Ray DIffraction	2.9 Å	4Z36	Gln125, Gly179, Ser183	A	10.1016/j.cell.2015.06.002
37	HIST1H3A	Histone H3.1	P68431	9606.ENSP00000484841	HIST1H3A,HIST1H3B,HIST1H3C,HIST1H3D,HIST1H3E,HIST1H3F,HIST1H3G,HIST1H3H,HIST1H3I,HIST1H3J	hsa:8350, hsa:8351, hsa:8352, hsa:8353, hsa:8354, hsa:8355, hsa:8356, hsa:8357, hsa:8358, hsa:8968	X- Ray DIffraction	1.75 Å	1O9S	His297, Glu356, Trp352, Asn296, Glu228, Asn265, Ala226	A/B	10.1038/nature01378
38	PPP1CA	Serine/threonine protein phosphatase	P62136	9606.ENSP00000326031	PPP1CA	hsa:5499	X- Ray DIffraction	1.63 Å	3E7A	Val250, Arg221, Ser129	A	10.1016/j.jmb.2008.10.053
39	ABL1	Tyrosine protein kinase	P00519	9606.ENSP00000361423	ABL1	hsa:25	X- Ray DIffraction	3.42 Å	1OPL	Ala288, Leu389, Leu267, Gly340, Met337	A	10.1016/s0092-8674(03)00194-6
40	IRF8	Interferon regulatory factor 8	Q02556	9606.ENSP00000268638	IRF8	hsa:3394	X-Ray Unavailable	Uavailable	Uavailable	Uavailable	Uavailable	Uavailable
41	H2AFX	Histone H2AX	P16104	9606.ENSP00000434024	H2AFX	hsa:3014	X- Ray DIffraction	1.5 Å	3U3Z	Met655, Ser654, Thr653, Met652, Pro677, Asp678, Asn696	B	10.1073/pnas.1212366109
42	CNR1	Cannabinoid receptor 1	P21554	9606.ENSP00000358513	CNR1	hsa:1268	X-Ray Unavailable	2.6 Å	5U09	Val196, Phe170, Phe102	A	10.1038/nature20613
43	SIN3A	Paired amphipathic helix protein	Q96ST3	9606.ENSP00000378402	SIN3A	hsa:25942	X-Ray Unavailable	Uavailable	Uavailable	Uavailable	Uavailable	Uavailable
44	HSPA9	Stress-70 protein	P38646	9606.ENSP00000297185	HSPA9	hsa:3313	X- Ray DIffraction	2 Å	6P2U	Cys317	A	10.1002/1873-3468.13475
45	IQCB1	IQ calmodulin-binding motif-containing protein 1	Q15051	9606.ENSP00000311505	IQCB1	hsa:9657	X-Ray Unavailable	Uavailable	Uavailable	Uavailable	Uavailable	Uavailable
46	RPL13	60S ribosomal protein L13	P26373	9606.ENSP00000307889	RPL13	hsa:6137	X-Ray Unavailable	Uavailable	Uavailable	Uavailable	Uavailable	Uavailable
47	SLC25A5	ADP/ATP translocase 2	P05141	9606.ENSP00000360671	SLC25A5	hsa:292	X-Ray Unavailable	Uavailable	Uavailable	Uavailable	Uavailable	Uavailable
48	IRF9	Interferon regulatory factor 9	Q00978	9606.ENSP00000380073	IRF9	hsa:10379	X-Ray Unavailable	Uavailable	Uavailable	Uavailable	Uavailable	Uavailable
49	ISG15	Ubiquitin-like protein ISG15	P05161	9606.ENSP00000368699	ISG15	hsa:9636	X- Ray DIffraction	2.29 Å	3SDL	Ile36	C/D	10.1073/pnas.1107032108
50	GZMK	Granzyme K	P49863	9606.ENSP00000231009	GZMK	hsa:3003	X- Ray DIffraction	2.23 Å	1MZA	Ile16, Ile17, Asp189, Ser190	A	10.1074/jbc.M207962200
