# Supplementary material for: VIRdb: a comprehensive database for interactive analysis of genes/proteins involved in the pathogenesis of vitiligo
Source: PeerJ. 2020 May 21;8:e9119. doi: 10.7717/peerj.9119 (PMC7246032; doi:10.7717/peerj.9119)
Supplement: Supplemental Information 2 — Differentially Expressed Genes for Lesional Vitiligio [file peerj-08-9119-s002.csv]

Gene_symbol	Status	Chromosome	Map_Location	Description	Type_of_Gene	logFC	P.Value	adj.P.Val	ID
ACYP1	Upregulated	14	14q24.3	acylphosphatase 1	protein-coding	0.99	1.22E-09	2.57E-06	205260_s_at
ADGRF4	Upregulated	6	6p12.3	adhesion G protein-coupled receptor F4	protein-coding	1.038	8.015E-06	0.00281	1553031_at | 237690_at
APLP2	Upregulated	11	11q24.3	amyloid beta precursor like protein 2	protein-coding	0.935	5.83E-06	0.0024	208701_at
ARNTL	Upregulated	11	11p15.3	aryl hydrocarbon receptor nuclear translocator like	protein-coding	1.36	9.16E-07	0.000613	209824_s_at
ATG2B	Upregulated	14	14q32.2	autophagy related 2B	protein-coding	0.72	1.39E-05	0.00455	219164_s_at
CEBPG	Upregulated	19	19q13.11	CCAAT enhancer binding protein gamma	protein-coding	0.925	2E-07	0.000185	225527_at
CLOCK	Upregulated	4	4q12	clock circadian regulator	protein-coding	0.73	1.26E-06	0.000776	225856_at
CPEB2	Upregulated	4	4p15.32	cytoplasmic polyadenylation element binding protein 2	protein-coding	1.06	5.58E-08	6.47E-05	235479_at
CREBZF	Upregulated	11	11q14.1	CREB/ATF bZIP transcription factor	protein-coding	0.625	5.28E-07	0.000385	225594_at
CTDSP2	Upregulated	12	12q14.1	CTD small phosphatase 2	protein-coding	0.618	4.47E-06	0.00196	208735_s_at
DCPS	Upregulated	11	11q24.2	decapping enzyme, scavenger	protein-coding	0.572	2.22E-06	0.00119	218774_at
DIP2A	Upregulated	21	21q22.3	disco interacting protein 2 homolog A	protein-coding	0.678	1.44E-07	0.000143	227199_at
DPP9	Upregulated	19	19p13.3	dipeptidyl peptidase 9	protein-coding	0.637	1.35E-05	0.00452	226916_x_at
FAM131A	Upregulated	3	3q27.1	family with sequence similarity 131 member A	protein-coding	0.599	8.22E-07	0.000576	221904_at
FKBP4	Upregulated	12	12p13.33	FKBP prolyl isomerase 4	protein-coding	0.504	6.44E-06	0.00261	200894_s_at
GATC	Upregulated	12	12q24.31	glutamyl-tRNA amidotransferase subunit C	protein-coding	0.52	5.68E-08	6.47E-05	201698_s_at
GRWD1	Upregulated	19	19q13.33	glutamate rich WD repeat containing 1	protein-coding	0.542	9.22E-06	0.00336	221549_at
HNRNPA3	Upregulated	2	2q31.2	heterogeneous nuclear ribonucleoprotein A3	protein-coding	0.617	1.35E-07	0.000142	211931_s_at
HNRNPA3P1	Upregulated	10	10q11.21	heterogeneous nuclear ribonucleoprotein A3 pseudogene 1	pseudo	0.617	1.35E-07	0.000142	211931_s_at
HTATSF1	Upregulated	X	Xq26.3	HIV-1 Tat specific factor 1	protein-coding	0.843	3.19E-11	2.44E-07	202602_s_at
IKZF2	Upregulated	2	2q34	IKAROS family zinc finger 2	protein-coding	1.1	8.42E-06	0.00313	220567_at
JKAMP	Upregulated	14	14q23.1	JNK1/MAPK8 associated membrane protein	protein-coding	0.572	5.26E-07	0.000385	223215_s_at
KCNJ12	Upregulated	17	17p11.2	potassium inwardly rectifying channel subfamily J member 12	protein-coding	1.17	4.33E-06	0.00194	232289_at
KCNJ18	Upregulated	17	17p11.2	potassium inwardly rectifying channel subfamily J member 18	protein-coding	1.17	4.33E-06	0.00194	232289_at
KLHL42	Upregulated	12	12p11.22	kelch like family member 42	protein-coding	0.659	1.13E-05	0.00395	225961_at
LOC100506639	Upregulated	5	5p12	uncharacterized LOC100506639	ncRNA	0.628	1.36E-05	0.00452	214741_at
MAFG	Upregulated	17	17q25.3	MAF bZIP transcription factor G	protein-coding	0.766	2.21E-08	3.1E-05	204970_s_at
MAGEF1	Upregulated	3	3q27.1	MAGE family member F1	protein-coding	0.534	1.74E-06	0.00101	218176_at
MED14	Upregulated	X	Xp11.4	mediator complex subunit 14	protein-coding	0.683	3.45E-06	0.00168	202611_s_at
MFN2	Upregulated	1	1p36.22	mitofusin 2	protein-coding	0.568	1.22E-06	0.000758	201155_s_at
MIR3658	Upregulated	1	1q24.1	microRNA 3658	ncRNA	0.78	8.15E-07	0.000576	209825_s_at
MRPS23	Upregulated	17	17q22	mitochondrial ribosomal protein S23	protein-coding	0.881	1.09E-06	0.000696	223156_at
NFIX	Upregulated	19	19p13.13	nuclear factor I X	protein-coding	0.638	1.02E-05	0.00361	228278_at
NPAS2	Upregulated	2	2q11.2	neuronal PAS domain protein 2	protein-coding	0.99	1.58E-05	0.00494	39548_at
ORC2	Upregulated	2	2q33.1	origin recognition complex subunit 2	protein-coding	0.88	1.47E-08	2.23E-05	204853_at
PAGR1	Upregulated	16	16p11.2	PAXIP1 associated glutamate rich protein 1	protein-coding	1.03	3.43E-08	4.37E-05	218300_at
PDPK1	Upregulated	16	16p13.3	3-phosphoinositide dependent protein kinase 1	protein-coding	0.846	4.33E-07	0.000338	221244_s_at
PEX5	Upregulated	12	12p13.31	peroxisomal biogenesis factor 5	protein-coding	0.816	3.31E-07	0.000274	203244_at
PRKX	Upregulated	X	Xp22.33	protein kinase X-linked	protein-coding	0.9815	7E-08	7.9E-05	204061_at | 204060_s_at
PRKY	Upregulated	Y	Yp11.2	protein kinase Y-linked (pseudogene)	pseudo	0.987	2.7E-08	3.6E-05	204060_s_at
RAB18	Upregulated	10	10p12.1	RAB18, member RAS oncogene family	protein-coding	0.54	5.35E-06	0.00227	224787_s_at
RBM17	Upregulated	10	10p15.1	RNA binding motif protein 17	protein-coding	0.549	1.68E-08	2.42E-05	224781_s_at
RIPK4	Upregulated	21	21q22.3	receptor interacting serine/threonine kinase 4	protein-coding	0.642	1.47E-05	0.00461	221215_s_at
SEMA4C	Upregulated	2	2q11.2	semaphorin 4C	protein-coding	0.63	1.38E-05	0.00453	219039_at
SNORD50A	Upregulated	6	6q14.3	small nucleolar RNA, C/D box 50A	snoRNA	0.615	2.15E-06	0.00119	244669_at
SNORD50B	Upregulated	6	6q14.3	small nucleolar RNA, C/D box 50B	snoRNA	0.615	2.15E-06	0.00119	244669_at
SRSF1	Upregulated	17	17q22	serine and arginine rich splicing factor 1	protein-coding	0.825	1.45E-05	0.00458	201741_x_at
SRSF9	Upregulated	12	12q24.31	serine and arginine rich splicing factor 9	protein-coding	0.52	5.68E-08	6.47E-05	201698_s_at
TLE4	Upregulated	9	9q21.31	TLE family member 4, transcriptional corepressor	protein-coding	0.864	1.68E-06	0.00099	235765_at
TMEM70	Upregulated	8	8q21.11	transmembrane protein 70	protein-coding	0.801	1.9573E-07	0.0001607	219449_s_at | 226083_at
TP53	Upregulated	17	17p13.1	tumor protein p53	protein-coding	0.94	1.08E-06	0.000696	211300_s_at
TRNAU1AP	Upregulated	1	1p35.3	tRNA selenocysteine 1 associated protein 1	protein-coding	0.562	9.19E-07	0.000613	218977_s_at
UBALD2	Upregulated	17	17q25.1	UBA like domain containing 2	protein-coding	0.759	2.73E-06	0.0014	224783_at
UCK2	Upregulated	1	1q24.1	uridine-cytidine kinase 2	protein-coding	0.78	8.15E-07	0.000576	209825_s_at
UPRT	Upregulated	X	Xq13.3	uracil phosphoribosyltransferase homolog	protein-coding	0.615	3.42E-06	0.00168	226199_at
USP47	Upregulated	11	11p15.3	ubiquitin specific peptidase 47	protein-coding	0.556	1.38E-06	0.000832	221518_s_at
ZNF131	Upregulated	5	5p12	zinc finger protein 131	protein-coding	0.628	1.36E-05	0.00452	214741_at
ZNF330	Upregulated	4	4q31.21	zinc finger protein 330	protein-coding	0.537	7.39E-06	0.00289	209814_at
ZNF436	Upregulated	1	1p36.12	zinc finger protein 436	protein-coding	0.692	1.87E-06	0.00106	226114_at
ZNF569	Upregulated	19	19q13.12	zinc finger protein 569	protein-coding	0.697	1.33E-05	0.00452	1553696_s_at
ZRANB1	Upregulated	10	10q26.13	zinc finger RANBP2-type containing 1	protein-coding	0.503	4.8E-06	0.00207	225130_at
ALX1	Downregulated	12	12q21.31	ALX homeobox 1	protein-coding	-1.73	2.55E-08	3.48E-05	206837_at
AP2B1	Upregulated	17	17q12	adaptor related protein complex 2 subunit beta 1	protein-coding	-0.553	8.07E-06	0.00306	200615_s_at
APBA2	Downregulated	15	15q13.1	amyloid beta precursor protein binding family A member 2	protein-coding	-1.26	1.535E-07	0.000152	209871_s_at | 209870_s_at
BCAN	Downregulated	1	1q23.1	brevican	protein-coding	-1.475	3.7203295E-06	0.00144586	221623_at | 219107_at
BHLHE41	Downregulated	12	12p12.1	basic helix-loop-helix family member e41	protein-coding	-1.12	9.86E-07	0.000649	221530_s_at
CA14	Downregulated	1	1q21.2	carbonic anhydrase 14	protein-coding	-2.03	3.57E-11	2.44E-07	219464_at
CAPN3	Downregulated	15	15q15.1	calpain 3	protein-coding	-1.54333333333333	1.2830315E-06	0.000658476666667	211890_x_at | 210944_s_at | 214475_x_at
CDC42EP3	Upregulated	2	2p22.2	CDC42 effector protein 3	protein-coding	-0.861	4.23E-06	0.00191	225685_at
CDH3	Downregulated	16	16q22.1	cadherin 3	protein-coding	-1.2	4.1E-06	0.0019	203256_at
CLEC12B	Downregulated	12	12p13.2	C-type lectin domain family 12 member B	protein-coding	-3.1	4.66E-10	1.323E-06	231600_at | 231357_at
CRABP1	Downregulated	15	15q25.1	cellular retinoic acid binding protein 1	protein-coding	-2.15	4.43E-07	0.000341	205350_at
DCT	Downregulated	13	13q32.1	dopachrome tautomerase	protein-coding	-4.2725	4.921435E-10	1.089045E-06	205338_s_at | 216513_at | 216512_s_at | 205337_at
DPP6	Downregulated	7	7q36.2	dipeptidyl peptidase like 6	protein-coding	-2.03	2.09E-06	0.00117	228546_at
EDNRB	Downregulated	13	13q22.3	endothelin receptor type B	protein-coding	-1.2405	6.9385E-06	0.0023825	204273_at | 204271_s_at
GAPDHS	Downregulated	19	19q13.12	glyceraldehyde-3-phosphate dehydrogenase, spermatogenic	protein-coding	-0.8	1.36E-05	0.00452	229645_at
GPM6B	Downregulated	X	Xp22.2	glycoprotein M6B	protein-coding	-1.06	1.21E-08	1.96E-05	207116_s_at
GPR143	Downregulated	X	Xp22.2	G protein-coupled receptor 143	protein-coding	-1.675	5.687125E-07	0.00039535	209168_at | 209170_s_at | 209167_at | 209169_at
GPR155	Upregulated	2	2q31.1	G protein-coupled receptor 155	protein-coding	-2.65	3.38E-13	6.16E-09	206696_at
IRF4	Downregulated	6	6p25.3	interferon regulatory factor 4	protein-coding	-0.764	4.12E-06	0.0019	239533_at
IRS4	Downregulated	X	Xq22.3	insulin receptor substrate 4	protein-coding	-1.48	4.64E-07	0.000349	204562_at
KCNAB2	Upregulated	1	1p36.31	potassium voltage-gated channel subfamily A regulatory beta subunit 2	protein-coding	-2.1	2.52E-10	8.35E-07	1560652_at
KCNN2	Downregulated	5	5q22.3	potassium calcium-activated channel subfamily N member 2	protein-coding	-0.825	4.24E-06	0.00191	203402_at
KIAA1549L	Downregulated	11	11p13	KIAA1549 like	protein-coding	-1.44	1.96E-06	0.0011	235486_at
KIF1A	Upregulated	2	2q37.3	kinesin family member 1A	protein-coding	-0.906	2.18E-06	0.00119	203849_s_at
L1CAM	Downregulated	X	Xq28	L1 cell adhesion molecule	protein-coding	-1.39	5.62E-06	0.00235	204584_at
LGI3	Downregulated	8	8p21.3	leucine rich repeat LGI family member 3	protein-coding	-1.42	4.65E-07	0.000349	238061_at
LHFPL3-AS1	Downregulated	7	7q22.2	LHFPL3 antisense RNA 1	ncRNA	-3.6	9.17E-11	4.3E-07	240366_at
LINC00518	Downregulated	6	6p24.3	long intergenic non-protein coding RNA 518	ncRNA	-2.86	8.81E-08	9.83E-05	244829_at
LOC100128079	Downregulated	16	16p11.2	uncharacterized LOC100128079	ncRNA	-1.26	5.61E-09	1.02E-05	1569620_s_at
LOC100505498	Downregulated	2	2q22.3	uncharacterized LOC100505498	ncRNA	-1.57	2.82E-08	3.67E-05	231337_at
LOC728715	Downregulated	12	12p13.31	ovostatin homolog 2	ncRNA	-1.25	8.39E-06	0.00313	228245_s_at
LSAMP	Downregulated	3	3q13.31	limbic system associated membrane protein	protein-coding	-1.006	3.9515E-06	0.001605	228218_at | 214460_at
LZTS1	Downregulated	8	8p21.3	leucine zipper tumor suppressor 1	protein-coding	-1.435	4.704E-07	0.00033535	47550_at | 219042_at
MAP9	Downregulated	4	4q32.1	microtubule associated protein 9	protein-coding	-1.01	7.63E-06	0.00292	239415_at
MFSD12	Downregulated	19	19p13.3	major facilitator superfamily domain containing 12	protein-coding	-1.5	5.2E-06	0.00222	220178_at
MIR6883	Downregulated	17	17p13.1	microRNA 6883	ncRNA	-1.17	1.15E-05	0.00399	36829_at
MLANA	Downregulated	9	9p24.1	melan-A	protein-coding	-4.795	1.285E-10	5.19E-07	206427_s_at | 206426_at
MYEF2	Downregulated	15	15q21.1	myelin expression factor 2	protein-coding	-2.91	7.1786E-08	7.2325E-05	222771_s_at | 222153_at
OCA2	Downregulated	15	15q12-q13.1	OCA2 melanosomal transmembrane protein	protein-coding	-1.97	2.46E-10	8.35E-07	206498_at
OVOS	Downregulated	12	12p13.31	alpha-2-macroglobulin like 1 pseudogene	pseudo	-1.25	8.39E-06	0.00313	228245_s_at
OVOS2	Downregulated	12	12p11.21	alpha-2-macroglobulin like 1 pseudogene	pseudo	-1.25	8.39E-06	0.00313	228245_s_at
PCSK2	Downregulated	20	20p12.1	proprotein convertase subtilisin/kexin type 2	protein-coding	-2.45	2.730595E-11	1.663255E-07	204869_at | 204870_s_at
PER1	Downregulated	17	17p13.1	period circadian regulator 1	protein-coding	-1.17	1.15E-05	0.00399	36829_at
PLP1	Downregulated	X	Xq22.2	proteolipid protein 1	protein-coding	-1.62	1.79E-07	0.000169	210198_s_at
PLPPR4	Downregulated	1	1p21.3-p21.2	phospholipid phosphatase related 4	protein-coding	-1.78	1.14E-07	0.000122	213496_at
PLXNC1	Downregulated	12	12q22	plexin C1	protein-coding	-1.55	3.22E-07	0.000274	213241_at
PMEL	Downregulated	12	12q13.2	premelanosome protein	protein-coding	-2.64	9.26E-10	2.11E-06	209848_s_at
SEMA6D	Upregulated	15	15q21.1	semaphorin 6D	protein-coding	-0.954	3.74E-06	0.00179	226492_at
SFTPC	Upregulated	8	8p21.3	surfactant protein C	protein-coding	-0.728666666666667	4.62513333333333E-07	0.000286333333333	211735_x_at | 205982_x_at | 214387_x_at
SLC1A4	Upregulated	2	2p14	solute carrier family 1 member 4	protein-coding	-0.865666666666667	5.65666666666667E-06	0.002323333333333	212811_x_at | 209610_s_at | 212810_s_at
SLC45A2	Downregulated	5	5p13.2	solute carrier family 45 member 2	protein-coding	-1.155	2.9224E-06	0.00123235	220245_at | 221644_s_at
SLC6A17	Downregulated	1	1p13.3	solute carrier family 6 member 17	protein-coding	-1.43	7.79E-10	1.93E-06	229925_at
SLCO4A1-AS1	Downregulated	20	20q13.33	SLCO4A1 antisense RNA 1	ncRNA	-1.35	1.02E-05	0.00361	1554332_a_at
STXBP6	Upregulated	14	14q12	syntaxin binding protein 6	protein-coding	-0.945	5.44E-06	0.00229	230560_at
TEX41	Downregulated	2	2q22.3	testis expressed 41	ncRNA	-1.57	2.82E-08	3.67E-05	231337_at
TRPM1	Downregulated	15	15q13.3	transient receptor potential cation channel subfamily M member 1	protein-coding	-2.5925	5.515708125E-07	0.00030054154	214410_at | 206479_at | 237069_s_at | 237070_at
TTYH2	Upregulated	17	17q25.1	tweety family member 2	protein-coding	-0.646	9.86E-06	0.00357	223741_s_at
TYR	Downregulated	11	11q14.3	tyrosinase	protein-coding	-3.94	4.2625E-11	2.4155E-07	1555505_a_at | 206630_at
TYRP1	Downregulated	9	9p23	tyrosinase related protein 1	protein-coding	-4.65	3.29E-07	0.000274	205694_at
VEPH1	Downregulated	3	3q25.31-q25.32	ventricular zone expressed PH domain containing 1	protein-coding	-2.74	1.22E-08	1.96E-05	232122_s_at
WDR63	Downregulated	1	1p22.3	WD repeat domain 63	protein-coding	-2.55	5.59E-08	6.47E-05	243087_at
ZNF280B	Downregulated	22	22q11.22	zinc finger protein 280B	protein-coding	-1.09	1.45E-05	0.00458	230789_at
