# Supplementary material for: VIRdb: a comprehensive database for interactive analysis of genes/proteins involved in the pathogenesis of vitiligo
Source: PeerJ. 2020 May 21;8:e9119. doi: 10.7717/peerj.9119 (PMC7246032; doi:10.7717/peerj.9119)
Supplement: Supplemental Information 3 — Differentially expressed genes for Non-Lesiional Vitiligo [file peerj-08-9119-s003.csv]

Gene_symbol	Status	Chromosome	Map_Location	Description	Type_of_Gene	logFC	P.Value	adj.P.Val	ID
ACYP1	Upregulated	14	14q24.3	acylphosphatase 1	protein-coding	0.908	2.65E-09	7.23E-05	205260_s_at
APLP2	Upregulated	11	11q24.3	amyloid beta precursor like protein 2	protein-coding	0.967	5.42E-08	0.0006054	208701_at
ARNTL	Upregulated	11	11p15.3	aryl hydrocarbon receptor nuclear translocator like	protein-coding	1.23	1.07E-06	0.0022424	209824_s_at
CEBPG	Upregulated	19	19q13.11	CCAAT enhancer binding protein gamma	protein-coding	0.8	7.23E-07	0.0017187	225527_at
CEP68	Upregulated	2	2p14	centrosomal protein 68	protein-coding	0.872	1.59E-06	0.0031083	1559159_at
CPEB2	Upregulated	4	4p15.32	cytoplasmic polyadenylation element binding protein 2	protein-coding	0.985	1.19E-07	0.0006831	235479_at
CREBZF	Upregulated	11	11q14.1	CREB/ATF bZIP transcription factor	protein-coding	0.699	6.63E-07	0.0017187	225594_at
DIP2A	Upregulated	21	21q22.3	disco interacting protein 2 homolog A	protein-coding	0.706	8.81E-08	0.0006831	227199_at
HNRNPA3	Upregulated	2	2q31.2	heterogeneous nuclear ribonucleoprotein A3	protein-coding	0.579	5.21E-07	0.0015818	211931_s_at
HNRNPA3P1	Upregulated	10	10q11.21	heterogeneous nuclear ribonucleoprotein A3 pseudogene 1	pseudo	0.579	5.21E-07	0.0015818	211931_s_at
HTATSF1	Upregulated	X	Xq26.3	HIV-1 Tat specific factor 1	protein-coding	0.78	6.03E-11	3.3E-06	202602_s_at
JKAMP	Upregulated	14	14q23.1	JNK1/MAPK8 associated membrane protein	protein-coding	0.556	8.4E-07	0.0019147	223215_s_at
KIN	Upregulated	10	10p14	Kin17 DNA and RNA binding protein	protein-coding	1.08	2.63E-06	0.0046401	242603_x_at
KLHL42	Upregulated	12	12p11.22	kelch like family member 42	protein-coding	0.676	2.16E-07	0.0010717	225961_at
MAFG	Upregulated	17	17q25.3	MAF bZIP transcription factor G	protein-coding	0.698	8.66E-08	0.0006831	204970_s_at
MFN2	Upregulated	1	1p36.22	mitofusin 2	protein-coding	0.611	3.62E-07	0.0011638	201155_s_at
ORC2	Upregulated	2	2q33.1	origin recognition complex subunit 2	protein-coding	0.781	1.2E-07	0.0006831	204853_at
PAGR1	Upregulated	16	16p11.2	PAXIP1 associated glutamate rich protein 1	protein-coding	0.965	3.43E-07	0.0011638	218300_at
PDPK1	Upregulated	16	16p13.3	3-phosphoinositide dependent protein kinase 1	protein-coding	0.741	1.15E-06	0.0023288	221244_s_at
PEX5	Upregulated	12	12p13.31	peroxisomal biogenesis factor 5	protein-coding	0.751	2.75E-06	0.0046953	203244_at
PRKX	Upregulated	X	Xp22.33	protein kinase X-linked	protein-coding	0.844	3.27E-07	0.0011638	204060_s_at
PRKY	Upregulated	Y	Yp11.2	protein kinase Y-linked (pseudogene)	pseudo	0.844	3.27E-07	0.0011638	204060_s_at
RGS12	Upregulated	4	4p16.3	regulator of G protein signaling 12	protein-coding	1.05	1.81E-06	0.0034097	242079_at
TLE4	Upregulated	9	9q21.31	TLE family member 4, transcriptional corepressor	protein-coding	0.843	1.25E-07	0.0006831	235765_at
TMEM70	Upregulated	8	8q21.11	transmembrane protein 70	protein-coding	0.751	3.5915E-07	0.00095275	219449_s_at | 226083_at
TRNAU1AP	Upregulated	1	1p35.3	tRNA selenocysteine 1 associated protein 1	protein-coding	0.521	1.87E-06	0.0034097	218977_s_at
USP47	Upregulated	11	11p15.3	ubiquitin specific peptidase 47	protein-coding	0.564	1.04E-06	0.0022424	221518_s_at
